# Supplementary material for: Deciphering the Microbial Taxonomy and Functionality of Two Diverse Mangrove Ecosystems and Their Potential Abilities To Produce Bioactive Compounds
Source: PubMed Central journal article supplement (PMC7593590; doi:10.1128/msystems.00851-19), 2020-10-27

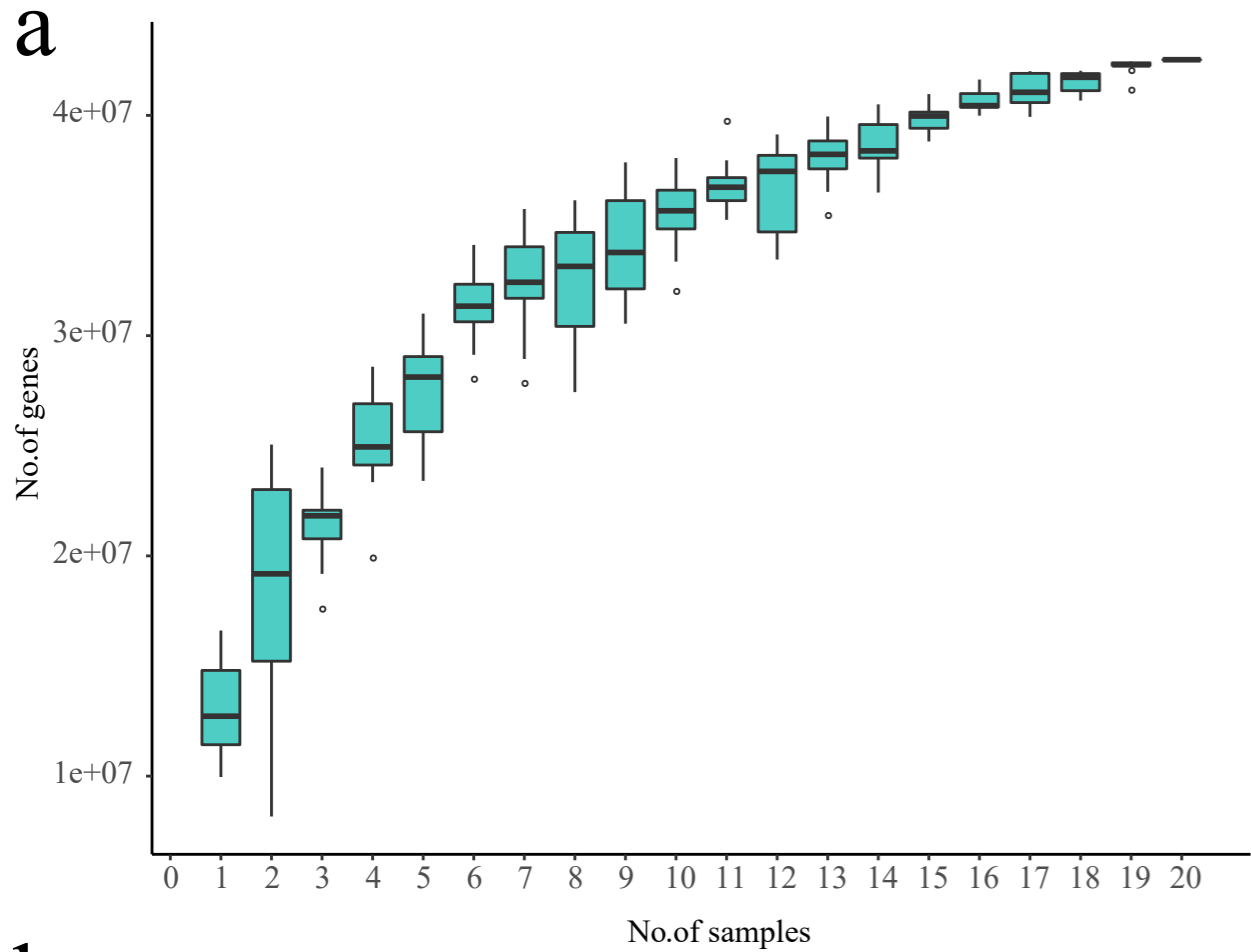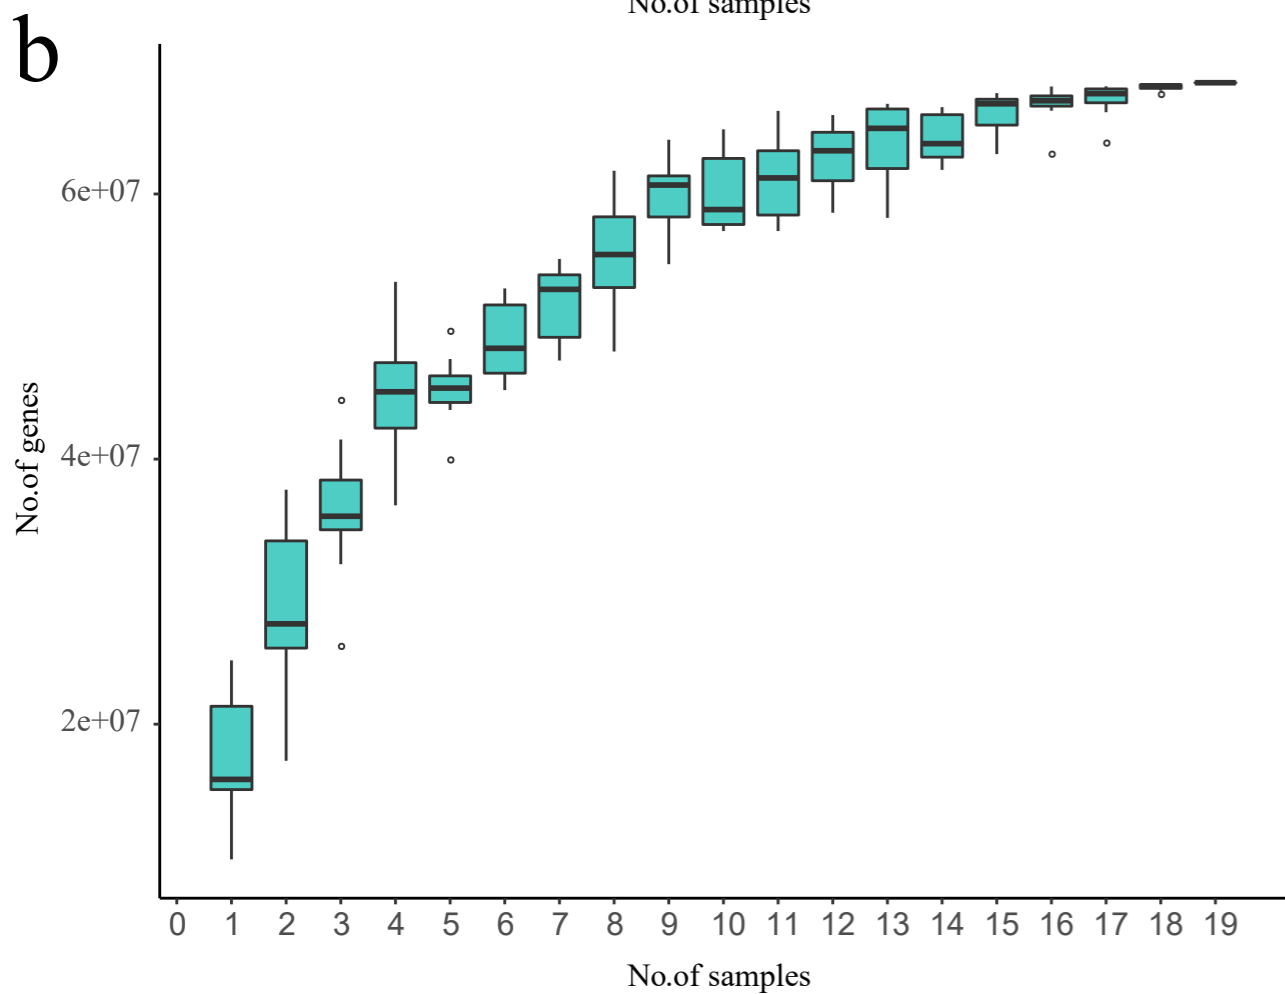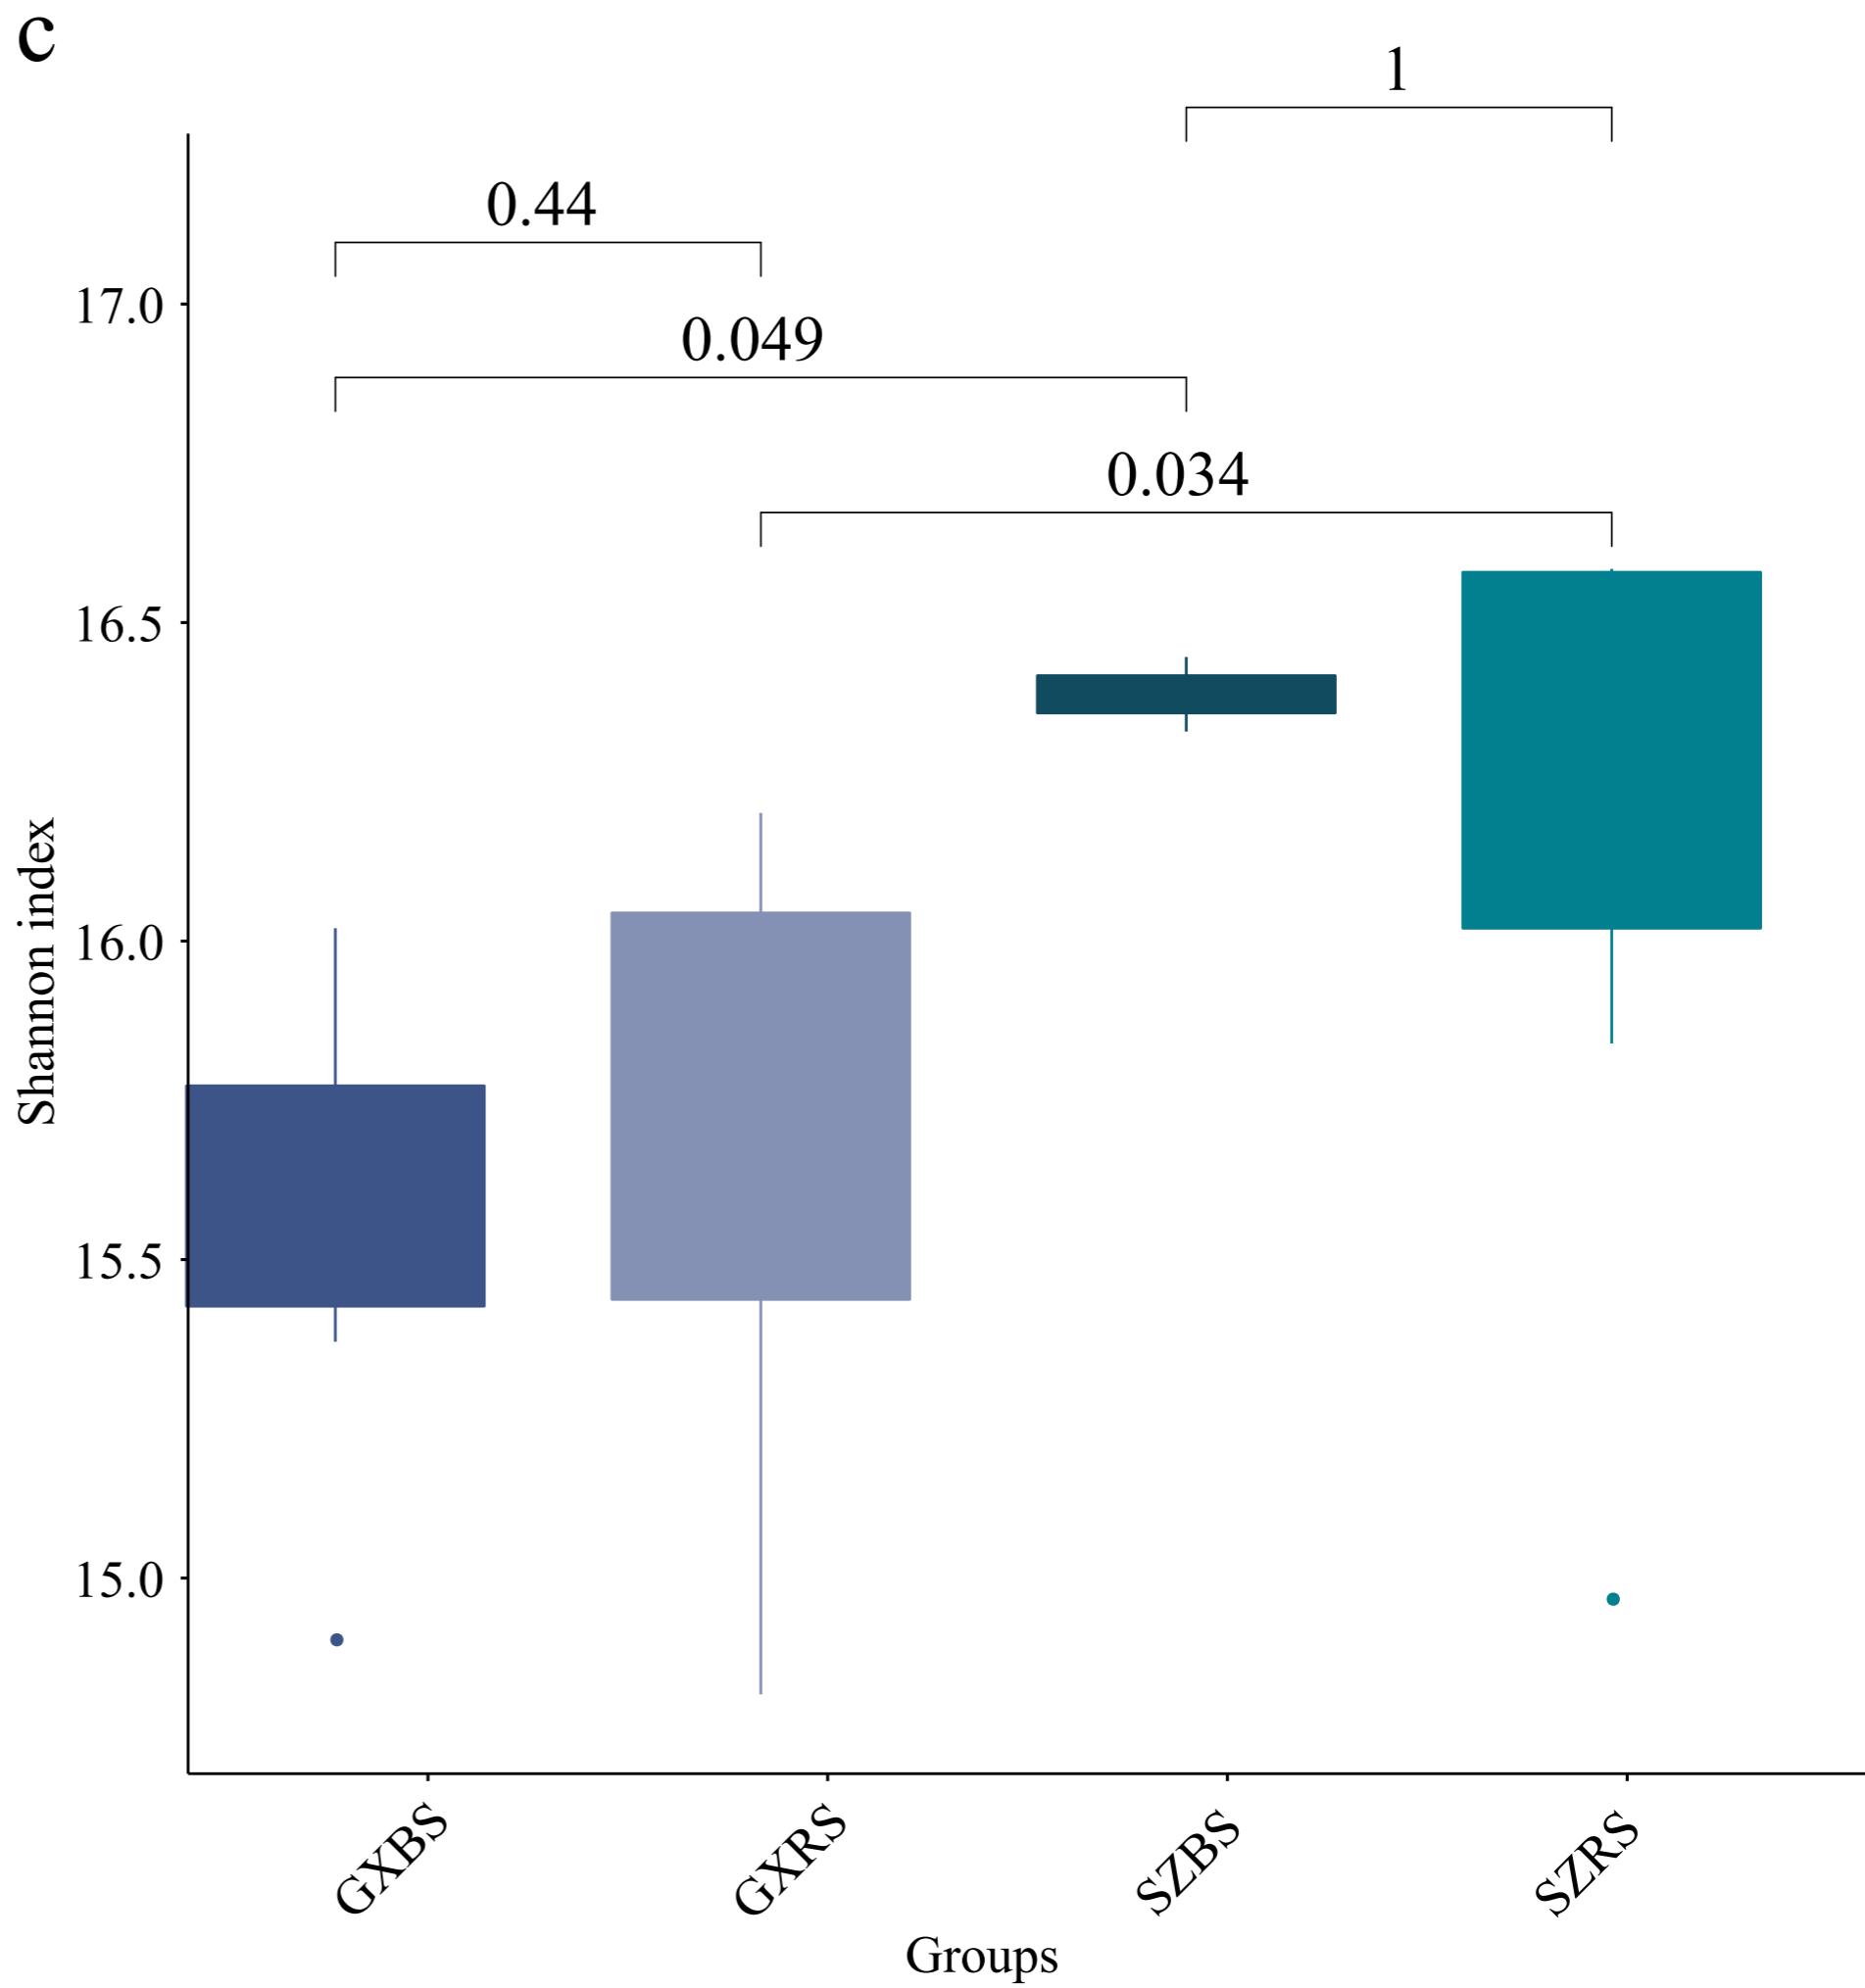

Supplement: mSystems.00851-19-sf001.pdf [file mSystems.00851-19-sf001.pdf]
