# Supplementary material for: Deciphering the Microbial Taxonomy and Functionality of Two Diverse Mangrove Ecosystems and Their Potential Abilities To Produce Bioactive Compounds
Source: PubMed Central journal article supplement (PMC7593590; doi:10.1128/msystems.00851-19), 2020-10-27

### a Methane metabolism ko00680

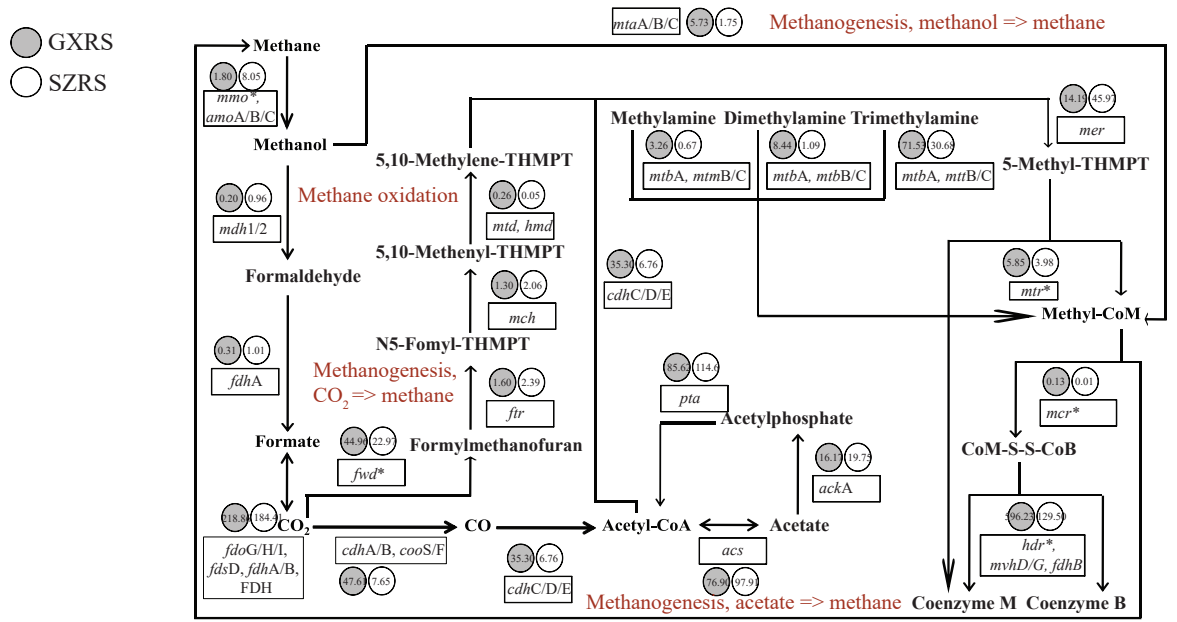

### b Nitrogen metabolism ko00910

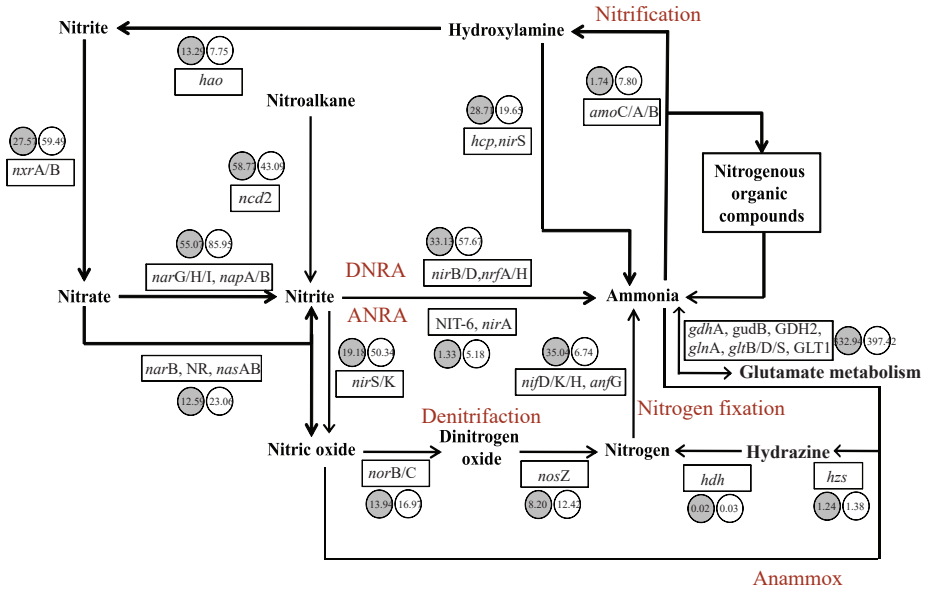

### c

### Sulfur metabolism ko00920

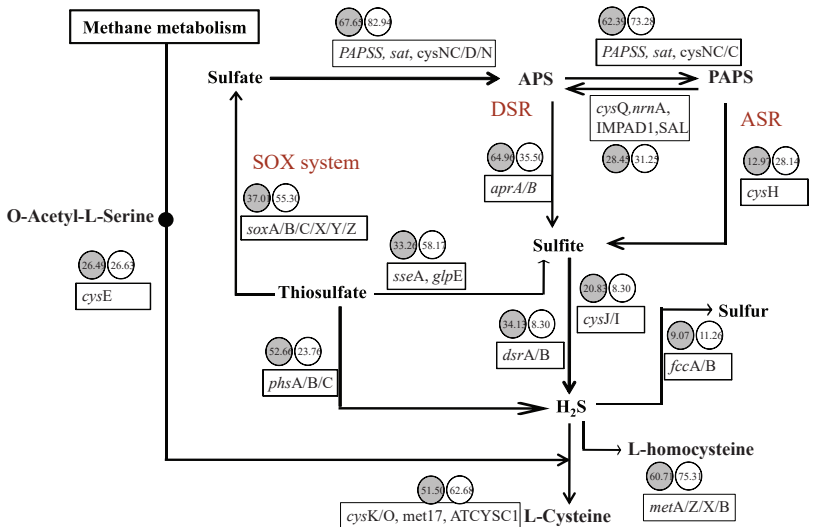

Supplement: mSystems.00851-19-sf003.pdf [file mSystems.00851-19-sf003.pdf]
